# A rainfall-manipulation experiment with 517 *Arabidopsis thaliana* accessions

Moises Exposito-Alonso<sup>1</sup>, Rocío Gómez Rodríguez<sup>2</sup>, Cristina Barragán<sup>1</sup>, Giovanna Capovilla<sup>1</sup>, Eunyoung Chae<sup>1</sup>, Jane Devos<sup>1</sup>, Ezgi S. Dogan<sup>1</sup>, Claudia Friedemann<sup>1</sup>, Caspar Gross<sup>1</sup>, Patricia Lang<sup>1</sup>, Derek Lundberg<sup>1</sup>, Vera Middendorf<sup>1</sup>, Jorge Kageyama<sup>1</sup>, Talia Karasov<sup>1</sup>, Sonja Kersten<sup>1</sup>, Sebastian Petersen<sup>1</sup>, Leily Rabbani<sup>1</sup>, Julian Regalado<sup>1</sup>, Lukas Reinelt<sup>1</sup>, Beth Rowan<sup>1</sup>, Danelle K. Seymour<sup>1</sup>, Efthymia Symeonidi<sup>1</sup>, Rebecca Schwab<sup>1</sup>, Diep Thi Ngoc Tran<sup>1</sup>, Kavita Venkataramani<sup>1</sup>, Anna-Lena Van de Weyer<sup>1</sup>, François Vasseur<sup>1</sup>, George Wang<sup>1</sup>, Ronja Wedegärtner<sup>1</sup>, Frank Weiss<sup>1</sup>, Rui Wu<sup>1</sup>, Wanyan Xi<sup>1</sup>, Maricris Zaidem<sup>1</sup>, Wangsheng Zhu<sup>1</sup>, Fernando García-Arenal<sup>2</sup>, Hernán A. Burbano<sup>1</sup>, Oliver Bossdorf<sup>3</sup>, Detlef Weigel<sup>1</sup>.

<sup>1</sup> Department of Molecular Biology, Max Planck Institute for Developmental Biology, Tübingen, Germany

<sup>2</sup> Center for Plant Biotechnology and Genomics, Technical University of Madrid, Pozuelo de Alarcón, Spain

<sup>3</sup> Institute of Ecology and Evolution, University of Tübingen, Tübingen, Germany

## Abstract

The gold standard for studying natural selection is to quantify lifetime fitness in individuals from natural populations that have been grown together under different field conditions. This has been widely done in ecology to measure phenotypic selection in nature for a wide range of organisms — an evolutionary force that seems to be most determined by local precipitation patterns. Studies that include whole-genome data would enable the translation of coefficients of selection to the genetic level, but such studies are still scarce, even though this type of genetic knowledge will be critical to predict the effect of climate change in natural populations. Here we present such an experiment including rainfall-manipulation with the plant *Arabidopsis thaliana*. The experiment was carried out in a Mediterranean and a Central European field station with rainout shelters to simulate a high and low rainfall treatment within each location. For each treatment combination, we planted 7 pots with one individual and 5 pots with 30 counted seeds of 517 whole-genome sequenced natural accessions covering the global species distribution. Survival, germination, flowering time, and final seed output were measured for ca. 25,000 pots, which contained ca. 14,500 individual plants and over 310,00 plants growing in small populations. This high-throughput phenotyping was only possible thanks to image analysis techniques using custom-made scripts. To make the data and processing code available, we created an R package “dryAR” (<http://github.com/MoisesExpositoAlonso/dryAR>).

Running title: A Climate Change Experiment with *A. thaliana*

Keywords: Field experiment, Climate Change, *Arabidopsis thaliana*

31

## Field experiment design

32

### The accessions from the 1001 Genomes Project

33

34

35

36

37

38

39

40

41

42

43

44

45

46

47

48

49

50

51

52

53

54

55

56

57

The 1001 Genomes (1001G) project (1001 Genomes Consortium 2016) comprises 1,135 sequenced genetic lines called accessions (Fig. 1). To select the most genetically and geographically informative and least biased 1001G lines, we set some quality criteria. These consisted of several filters: (1) First we removed the accessions with the lowest genome quality. We discarded those with  $< 10X$  genome coverage of Illumina sequencing reads and  $< 90\%$  congruence of SNPs called from MPI and GMI pipelines (1001 Genomes Consortium 2016), which resulted in 959 accessions. (2) We removed almost-identical individuals. Using Plink (Purcell et al. 2007) we computed identity by state genome-wide across the 1,135 accessions. For pairs of accessions with  $< 0.01$  differences per SNP, we randomly picked one. This resulted in 889 accessions. After applying criteria (1) and (2) sequentially, 762 accessions remained. (3) Finally, we reduced geographic ascertainment. Sampling for 1001G was not performed in either a random nor regularly structured scheme. Some laboratories provided several lines per location whereas others provided lines that were collected at least several hundred kilometres apart. Employing latitude and longitude degrees, we computed Euclidean distances across the 1,135 accessions and identified all pairs that were  $< 0.0001$  distance apart, that is, accessions from the same population ( $<< 100$  meters). From such pairs, we randomly picked one. Applying this filter independently of (1) and (2) resulted in 682 accessions. We intersected the resulting lists of accessions after the quality filtering procedures and obtained a final set of 523 accessions. We propagated accessions in controlled conditions. We stratified the seeds one week at  $4^{\circ}\text{C}$ , then we sowed them in trays with industrial soil (CL-P, Einheitserde Werkverband e.V., Sinntal-Altengronau Germany) and placed them in a growth room at 16h light and  $23^{\circ}\text{C}$  for a week. Trays were then vernalized for 60 days at  $4^{\circ}\text{C}$  vernalization and 8h light. After vernalization, trays were moved back to  $23^{\circ}\text{C}$  and 16 h light for final growth and reproduction. This generated sufficient seeds for 517 accessions that were then grown in the field (Fig. 1). Seeds descendant from the same parents can be ordered from the 1001G seed stock at the Arabidopsis Biological Resource Center (CS78942).

58

### Field settings and watering

59

#### Rainout shelter design

60

61

62

63

64

65

66

67

We built two 30 m x 6 m tunnels of PVC plastic foil to fully exclude rainfall in Madrid and in Tübingen (Fig. 2). The foil tunnels are different from a regular greenhouse in that they are completely open on two sides. Thus, ambient temperatures vary almost as much as in an outdoor experiment (see [Environmental sensors section](#)). In each location, we supplied artificial watering at two contrasting regimes: abundant watering and reduced watering. Inside each tunnel, we created an approximate 4% slope and set up four flooding tables on the ground (1 m x 25 m, Hellmuth Bahrs GmbH & Co KG, Brügggen, Germany) covered with soaking mats (4 L/m<sup>2</sup>, Gärtnereinkauf Münchingen GmbH, Münchingen, Germany). The lower end of the flooding table was used to

68 drain the water provided from the other, higher end of the table (Fig. 2). To imitate rainfall,  
69 watering was also supplied using a watering gun.

70 We used potting trays of 8x5 cells (5.5 cm x 5.5 cm x 10 cm size) and industrial soil (CL-P,  
71 Einheitserde Werkverband e.V., Sinnatal-Altengronau Germany). One genotype was planted per  
72 cell, excluding corner cells, to avoid edge effects. We grew a total of 12 replicates per genotype  
73 per treatment. Five replicates were planted at a density of 30 counted seeds per cell and grew  
74 without further intervention (“population replicate”). Seven were planted at low density (ca. 10  
75 seeds) and once germinated, one seedling was selected at random and all others were removed  
76 (“individual replicate”). While the population replicates should more faithfully reflect survival from  
77 seed to reproductive adult, the individual replicates were useful because they could be more  
78 accurately (individually) monitored for flowering time and seed set.

79 We used a randomized incomplete block design (Fig. 2). Because 36 pots were used per  
80 tray, a total of 14.36 trays amounted to one replicate of all 517 genotypes. A total of 16 treatment  
81 blocks were established. For each watering treatment there were two intercalated blocks. Within  
82 each flooding table there were four also intercalated blocks, two of individual replicates and two  
83 of population replicates. The genotypes were randomized within replicate block and were  
84 distributed along the treatment block. The design was identical in Madrid and Tübingen (Fig. 2).

#### 85 Environmental sensors

86 Environmental variables — air temperature, photosynthetic active radiation and soil water content  
87 — were monitored in real time (one record every 15 minutes) throughout the experiment using  
88 multi-purpose sensors (Flower Power sensor, Parrot SA, Paris, France). This enabled us to adjust  
89 watering depending on the degree of local evapotranspiration during the course the experiment.  
90 The sensors outside of the tunnel in Madrid (i.e. only natural rainfall) showed a interquartile range  
91 between 1 and 17% soil water content. This overlapped which the range of 10 to 22% water  
92 content of the drought treatment we artificially imposed inside of the tunnels both in Madrid and  
93 in Tübingen. The relatively lower measurements by the outside sensor in Madrid is due to a  
94 complete lack of natural rainfall during the first two months of the experiment. On the other  
95 hand, the sensor outside of the tunnel in Tübingen recorded an interquartile range of soil water  
96 content percentage, 22 to 27%, that was comparable to the high watering treatments in Tübingen  
97 and Madrid, from 20 to 33%. These values confirmed that our low and high watering treatment  
98 not only were different, but also that they mimicked natural watering of two contrasting locations.  
99 Air temperatures were overall higher in Madrid (5-6°C) than in Tübingen (8-10°C), as expected,  
100 and the difference in temperature between the sensors inside and outside of the tunnel was only  
101 of one degree on average (Table 1). The photosynthetic active radiation (PAR, wavelengths from  
102 400 to 700 nm) had a median of 0.1 mole m<sup>-2</sup> day<sup>-1</sup> at night for all experiments. At mid-day  
103 (11:00-13.00 hrs), the median PAR outside the tunnel in Madrid was 57.81 mole m<sup>-2</sup> day<sup>-1</sup> and  
104 45.24 and 46.24 for the low and high treatments inside the tunnel. In Tübingen, the median values  
105 were 29.02 outside, and 34.36 and 27.50 inside the tunnel.

106

## Sowing and quality control

107 During sowing, contamination of neighboring pots with adjacent genotypes can occur for multiple  
108 reasons. In order to avoid such contamination, we chose a day with no wind and we sowed the  
109 seeds at only 1-2 cm height from the soil. Additionally, watering during the first days was gentle to  
110 avoid seed-carryover. We also tried to remove human error during sowing by preparing and  
111 curating 2 mL plastic tubes containing the seeds to be sown in cardboard boxes with the same  
112 cells (5x8) as in the target trays and arranged them in their corresponding (randomised) locations.  
113 During sowing, each experimenter took a box at random and went to the corresponding  
114 previously labeled and arranged tray in the field (Fig. 2). This reduced the possibility of sowing  
115 errors.

116 Later, during the vegetative growth, we could identify germinated seedlings that looked like  
117 neighbour contamination and removed such plants. Although this meant the loss of a number of  
118 plants, the high replication of the experiment allowed this sacrifice. During the recording of  
119 flowering time, we used the homogeneity of flowering within a pot as a further indicator for  
120 contamination. When a plant had a completely different flowering timing and leaf phenotypes did  
121 not coincide with the majority of the pot, this plant was removed.

122 After sowing and removal of errors, the total number of pots was 24,747 instead of the  
123 original 24,816 pots.

124

## Monitoring of plants

125

### Image analysis of vegetative rosettes

126 Top-view images were taken every four to five days (median) with a Panasonic DMC-TZ61 digital  
127 camera and a customized closed dark box (Fig. 3) at a distance of 40 cm from each tray. After  
128 testing different camera parameters, we used an exposure of -2/3 and an ISO of 100. White  
129 balance was set for flashlight. As we used a dark box from all sides closed, this was the only  
130 source of illumination, which ensured that the white balance and illumination were consistent from  
131 picture to picture. Photos were saved both in .jpeg and .raw to allow for *a posteriori* adjustments  
132 if needed. Using a calibration board with white and dark squares of 1.3 cm x 1.3 cm, we studied  
133 the error in retrieving the true area across the tray. This provided us with a median resolution  
134 estimate of 101.5 pixels mm<sup>-2</sup>. The deviations from the true area were minimal, typically from 0 to  
135 5%, with a maximum of 8-9% deviation in area in the extreme corners of the tray (where we did  
136 not sow any seeds). We are confident that such small variation in retrieved area are more than  
137 compensated by the randomized locations of genotypes within the trays.

138 In total, we imaged each tray at 20 timepoints throughout the vegetative growth. All  
139 images are deposited at <http://datadryad.org/>[[updatehere](#)] and the Python module to process and

140 analyse them is available at <http://github.com/MoisesExpositoAlonso/hippo>. The implemented  
141 segmentation was virtually the same as in (Exposito-Alonso et al. 2017), which relies on the Open  
142 CV Python library (Itseez 2015). We began by transforming images from RGB to HSV channels.  
143 We applied a hard segmentation threshold of HSV values as (H=30-65, S=65-255, V=20-220). The  
144 threshold was defined after manually screening 10 different plants in order to capture the full  
145 spectrum of greens from different accessions and of different developmental stages. This was  
146 followed by several iterations of morphology transformations based on erosion and dilation. Then,  
147 for the resulting binary image we counted the number of green pixels.

148 During field monitoring we noticed that seeds in some pots had not germinated.  
149 Sometimes this was due to lack of seeds or improper soil compaction. In these cases, we left a red  
150 mark in those pots, which we could detect in the same way as the existence of green pixels (with  
151 threshold H=150-179, S=100-255, V=100-255). These pots were excluded from survival analysis  
152 as they did not contain any plants. An example of transformed images is shown in Fig. 3.

153 The resulting raw data consist of green and red area (pixel counts) per pot (Fig. 3). Some  
154 trays were photographed twice on the same day by mistake. We took advantage of this as a blind  
155 control to verify whether our camera settings and segmentation pipeline would recover the same  
156 area, i.e. to what degree the images were consistent and the pipeline was replicable. In total there  
157 were 1,508 pots whose area was estimated twice, distributed across 11 timepoints and different  
158 trays. The Spearman's rank correlation was  $r=0.97$ ,  $n=1508$ ,  $p<10^{-16}$ . This confirmed that  
159 replicability was high.

160 In order to remove pots that did not contain germinated seeds from the analyses, we  
161 performed an analysis of variance between pots above and below a moving threshold of red pixels  
162 to determine the number of red pixels. This provided us with the threshold at which which a pot  
163 was highly likely to have a red mark (indicating an empty pot). As expected, the distribution of  
164 pixels was bimodal (Fig. 3), what made this process straightforward and reliable.

165 Then we estimated germination timing. One approach to do this was to model growth  
166 trajectories (Fig. 3) of green pixels per pot as a sigmoidal curve, fitting the function:

$$y = \frac{a}{1+e^{-(b \times (x-c))}}$$

167 , starting on the sowing day and until the apparent peak of green pixels per pot. The  
168 sigmoidal curve could be fitted for 12,636 pots. The three parameters a, b, and c, inform about the  
169 different shapes of growth curves. We also computed less complex indicators of growth: an  
170 analogous linear model that was used to determine the intersection with 1,000 pixels, i.e., the day  
171 that over 1,000 green pixels were observed ( $\sim 10 \text{ mm}^2$ , Fig. 4), the day that a fitted spline passed  
172 over 1,000 green pixels, and a total count of green and red pixels through all timepoints. A  
173 detailed R markdown document of data loading and cleaning can be found at  
174 [http://github.com/MoisesExpositoAlonso/field/data-cleaning/gen\\_vegetative.html](http://github.com/MoisesExpositoAlonso/field/data-cleaning/gen_vegetative.html). The final dataset

175 contained data for 22,779 pots — after the removal of pots with red labels — for which we had a  
176 time series of green areas.

## 177 **Manual recording of flowering time**

178 We visited the experiment every 1-2 days and manually recorded the pots with flowering plants.  
179 To keep track of previous visits and avoid errors, we labeled the pots where flowering had already  
180 been recorded with blue pins. This removed another potential source of human error. To  
181 calculate flowering time, we counted the number of days from the date of sowing to the recorded  
182 flowering date. Fig. 4 shows the raw flowering time data per pot in the original spatial distribution  
183 (Fig. 2) and the distribution of flowering time per treatment combination. Note that grey boxes in  
184 Fig. 4 are pots with plants that did not survive until flowering. For more visualizations of flowering  
185 time see [http://github.com/MoisesExpositoAlonso/dryAR/analyses/flowering\\_exploration.html](http://github.com/MoisesExpositoAlonso/dryAR/analyses/flowering_exploration.html). In  
186 total, we gathered data for 16,858 flowering pots.

## 187 **Image analysis of reproductive plants**

188 Once the first dry fruits were observed, we harvested them and took a final 'studio photograph' of  
189 the rosette and the inflorescence (Fig. 5). In total, we took 13,849 photographs. The camera  
190 settings were the same as for the vegetative monitoring, but here we included an 18% grey card  
191 approximately in the same location in case *a posteriori* adjustments would be needed. The Python  
192 module to analyse the inflorescence pictures (Fig. 5) is available at  
193 <http://github.com/MoisesExpositoAlonso/hitfruit>. We first used a cycle of morphological  
194 transformations of erode-and-dilate to produce the segmented image (Fig. 5). This generated a  
195 segmented white/black image without white noise. Then, we used the thin (erode cycles)  
196 algorithm from the Mahotas library (Coelho 2013) to generate a binary picture reduced to  
197 single-pixel paths — a process called skeletonisation (Fig. 5). Finally, to detect the branching points  
198 in the skeletonised image we used a hit or miss algorithm from Mahotas. We used customized  
199 structural elements to maximize the branch (Fig. 5) and end point detection (Fig. 5). This resulted  
200 in four variables per image: total segmented inflorescence area, total length of the skeleton path,  
201 number of branching points and number of end points (Fig. 5).

202 Because we ran the same segmentation and skeletonization software on rosette images, we  
203 could leverage the different image patterns that rosettes and inflorescences have to identify  
204 labeling errors (i.e. mistakes in inputting sample information of the pictures). To do this, we first  
205 trained a random forest model to predict the manually labeled organ by the four image variables.  
206 From this exercise, a total of 92.1% were correctly predicted from image analysis, and ca. 2,000  
207 images were incorrectly predicted. This could be either because there might be ranges of organ  
208 morphology that are relatively similar (for instance, we noticed that very small inflorescences and  
209 rosettes were confounded), or could be due to real mislabeling. Manually re-labeling about 500  
210 pictures, we discovered that only the 2.5% of them had been incorrectly labeled. As the mislabeled



211 subset of 2,000 images picked by the machine learning algorithm must contain an  
212 overrepresentation of errors, we are confident that the labeling error in the dataset of 13,848  
213 imaged plants must be below 2.5%.

214 A detailed R markdown document of data loading and cleaning can be found at  
215 [http://github.com/MoisesExpositoAlonso/field/data-cleaning/gen\\_harvesting.html](http://github.com/MoisesExpositoAlonso/field/data-cleaning/gen_harvesting.html).

216 Prediction of number of fruits and seeds

217 Although the study of natural selection is based on studying relative fitness, sometimes it is useful  
218 to have at least an approximation of the absolute fitness. In order to provide an approximate  
219 number of how many seeds each plant had produced, we generated two allometric relationships  
220 by manual counting of fruits per plant and seeds per fruit. In order to be sure that the counts  
221 corresponded to single plants, we counted fruits and seeds of only individual replicates of  
222 accessions, not the population replicates (see [Field experiment design section](#)). The first allometric  
223 relationship was built by manually counting the number of fruits per inflorescence of three sets of  
224 inflorescences, very small, intermediate, and very large ones ( $n=11$ ). The variance explained by the  
225 carefully counted number of fruits and the four image analysis variables was high ( $R^2=0.97$ ,  
226  $p=4 \times 10^{-4}$ ). We believe that the prediction of the number of fruits is appropriate for this type of  
227 data, as we had already shown a similar relationship with 350 manually counted fruits (Vasseur et  
228 al. 2017). The second relationship was the average number of seeds per fruit. To do this, in the  
229 same samples as before, we counted all seeds inside one fruit ( $n=11$ ). We tried to sample fruits  
230 capturing the entire range of fruit size variation. The mean was 28.3 seeds per fruit and the  
231 standard deviation was 11.2 seeds. The two aforementioned allometric relationships were used to  
232 predict, first, the number of fruits per inflorescence using the four image analysis variables, and  
233 second, the number of seeds corresponding to the number of fruits per inflorescence.

## 234 **Conclusions**

235 This high-throughput field experiment has generated an invaluable dataset to study natural  
236 selection and adaptation in the context of global climate change — at the genetic level.

## 237 **Author contributions**

238 MEA conceived and designed the project. MEA carried out the experiment in Tübingen. MEA and  
239 RGR carried out the experiment in Madrid. All authors contributed to specific tasks in the  
240 experiments (see detailed description below). OB provided the field site in Tübingen and FGA  
241 provided the site in Madrid. DW secured funding for the project. MEA carried out the analyses  
242 and wrote the first draft of the manuscript. All authors commented and approved the manuscript.

| AUTHOR                 | Conceived_idea | Funding | Advice | Coordination | Materials | Bulking_seeds | Seed_alliquoting | Field_setup | Pictures_plants | Sowing_Madrid | Sowing_Tuebingen | Thinning_seedlings | Field_care | Image_processing | Foil_tunnel_reparation | Fresh_harvesting_Madrid | Fresh_harvesting_Tuebingen | Dry_imaging_Madrid | Dry_imaging_Tuebingen | Flowering_monitoring | Image_processing | Data analysis/processing | Writing |
|------------------------|----------------|---------|--------|--------------|-----------|---------------|------------------|-------------|-----------------|---------------|------------------|--------------------|------------|------------------|------------------------|-------------------------|----------------------------|--------------------|-----------------------|----------------------|------------------|--------------------------|---------|
| Moises Exposito-Alonso | x              |         |        | x            | x         | x             | x                | x           | x               | x             | x                | x                  | x          | x                | x                      | x                       | x                          | x                  | x                     | x                    | x                | x                        | x       |
| Rocio Gomez Rodriguez  |                |         |        |              |           |               | x                | x           | x               | x             |                  |                    | x          |                  |                        | x                       |                            |                    |                       |                      | x                |                          |         |
| Detlef Weigel          |                | x       | x      |              | x         |               |                  |             |                 |               |                  |                    |            |                  |                        |                         |                            | x                  |                       |                      |                  |                          |         |
| Hernán A Burbano       |                |         | x      |              |           |               |                  |             |                 | x             |                  |                    |            |                  |                        |                         |                            |                    |                       |                      |                  |                          |         |
| Oliver Bossdorf        |                |         | x      |              | x         |               |                  |             |                 |               |                  |                    |            |                  |                        |                         |                            |                    |                       |                      |                  |                          |         |
| Rebecca Schwab         |                |         | x      | x            | x         |               |                  |             |                 |               |                  |                    |            |                  |                        |                         |                            | x                  |                       |                      |                  |                          |         |
| Fernando García Arenal |                |         | x      |              | x         |               |                  |             |                 |               |                  |                    |            |                  |                        |                         |                            |                    |                       |                      |                  |                          |         |
| George Wang            |                |         | x      |              |           |               |                  |             |                 |               |                  |                    |            |                  |                        |                         |                            |                    |                       |                      |                  |                          |         |
| François Vasseur       |                |         | x      |              |           |               |                  |             |                 |               | x                |                    |            |                  |                        |                         |                            |                    |                       |                      |                  |                          |         |
| Julian Regalado        |                |         |        |              |           |               | x                |             |                 |               |                  |                    |            |                  |                        |                         |                            |                    |                       |                      |                  |                          |         |
| Derek Lundberg         |                |         |        |              |           |               |                  |             |                 |               | x                |                    |            |                  |                        |                         |                            | x                  |                       |                      |                  |                          |         |
| Ronja Wedegärtner      |                |         |        |              |           |               | x                | x           | x               |               | x                |                    |            | x                |                        |                         |                            | x                  |                       |                      |                  |                          |         |
| Frank Weiss            |                |         |        |              |           |               |                  |             | x               |               |                  |                    |            |                  |                        |                         |                            |                    |                       |                      |                  |                          |         |
| Danelle Seymour        |                |         |        |              |           |               |                  |             |                 |               | x                |                    |            |                  |                        |                         |                            |                    |                       |                      |                  |                          |         |
| Beth Rowan             |                |         |        |              |           |               |                  |             |                 |               | x                |                    |            |                  | x                      |                         |                            | x                  |                       |                      |                  |                          |         |
| Patricia Lang          |                |         |        |              |           |               |                  |             | x               |               | x                | x                  |            |                  | x                      | x                       |                            | x                  |                       |                      |                  |                          |         |
| Jorge Kagayema         |                |         |        |              |           |               |                  |             |                 |               | x                |                    |            |                  |                        |                         |                            |                    |                       |                      |                  |                          |         |
| Rui Wu                 |                |         |        |              |           |               |                  |             |                 |               | x                |                    |            |                  | x                      |                         |                            | x                  |                       |                      |                  |                          |         |
| Wanyan Xi              |                |         |        |              |           |               |                  |             |                 |               | x                |                    |            |                  |                        |                         |                            |                    |                       |                      |                  |                          |         |
| Kavita Venkataramani   |                |         |        |              |           |               |                  |             |                 |               | x                |                    |            |                  | x                      | x                       |                            | x                  |                       |                      |                  |                          |         |
| Giovanna Capovilla     |                |         |        |              |           |               |                  |             |                 |               |                  | x                  |            |                  | x                      |                         |                            | x                  |                       |                      |                  |                          |         |
| Efthymia Symeonidi     |                |         |        |              |           |               |                  | x           |                 |               |                  | x                  |            |                  | x                      |                         |                            | x                  |                       |                      |                  |                          |         |
| Vera Middendorf        |                |         |        |              |           |               |                  |             |                 |               |                  | x                  |            |                  |                        |                         |                            |                    | x                     | x                    |                  |                          |         |
| Anna-Lena Van de Weyer |                |         |        |              |           |               |                  |             |                 |               |                  | x                  |            |                  |                        |                         |                            |                    |                       |                      |                  |                          |         |
| Jane Devos             |                |         |        |              |           |               |                  |             |                 |               |                  | x                  |            |                  |                        |                         |                            |                    |                       |                      |                  |                          |         |
| Diep Thi Ngoc Tran     |                |         |        |              |           |               |                  |             |                 |               |                  | x                  |            |                  |                        |                         |                            |                    |                       |                      |                  |                          |         |
| Sonja Kersten          |                |         |        |              | x         |               |                  |             |                 |               | x                |                    |            |                  |                        | x                       |                            |                    |                       |                      |                  |                          |         |
| Wangsheng Zhu          |                |         |        |              |           |               |                  |             |                 |               |                  |                    |            |                  |                        | x                       |                            |                    |                       |                      |                  |                          |         |
| Maricris Zaidem        |                |         |        |              |           |               |                  |             |                 |               |                  |                    |            |                  |                        | x                       |                            |                    |                       |                      |                  |                          |         |
| Sebastian Petersen     |                |         |        |              |           |               |                  |             |                 |               |                  |                    |            |                  |                        |                         |                            |                    |                       |                      |                  |                          |         |
| Ezgi Dogan             |                |         |        |              |           |               |                  |             |                 |               |                  |                    |            |                  |                        |                         |                            |                    |                       |                      |                  |                          |         |
| Claudia Friedemann     |                |         |        |              |           |               |                  |             |                 |               |                  |                    |            |                  |                        |                         |                            | x                  | x                     |                      |                  |                          |         |
| Talia Karasov          |                |         |        |              |           |               |                  |             |                 |               |                  |                    |            |                  |                        |                         |                            | x                  |                       |                      |                  |                          |         |
| Cristina Barragán      |                |         |        |              |           |               |                  |             |                 |               |                  |                    |            |                  |                        |                         |                            | x                  |                       |                      |                  |                          |         |
| Leily Rabbani          |                |         |        |              |           |               |                  |             |                 |               |                  |                    |            |                  |                        |                         |                            |                    |                       |                      |                  |                          |         |
| Caspar Gross           |                |         |        |              |           |               |                  |             |                 |               |                  |                    |            |                  |                        |                         |                            |                    |                       |                      |                  |                          |         |
| Lukas Reinelt          |                |         |        |              |           |               |                  |             |                 |               |                  |                    |            |                  |                        |                         |                            |                    |                       |                      |                  |                          |         |
| Eunyoung Chae          |                |         |        |              |           |               |                  |             |                 |               |                  |                    |            |                  |                        |                         |                            |                    |                       |                      |                  |                          |         |

243

## Acknowledgements

244

We are thankful to Belen Mendez-Vigo, Carlos Alonso-Blanco and the technical service at CBGP-UMP, Antolín López Quirós, Marisa López Herránz and Miguel Ángel Mora Plaza, for assistance during sowing in Madrid, and Xavi Picó for experimental design advice.

245

246

247

## References

248

1001 Genomes Consortium. 2016. "1,135 Genomes Reveal the Global Pattern of Polymorphism in Arabidopsis Thaliana." *Cell* 166 (2). Elsevier: 481–91. doi:10.1016/j.cell.2016.05.063.

249

250

Coelho, Luis Pedro. 2013. "Mahotas: Open Source Software for Scriptable Computer Vision." *Journal of Open Research Software* 1 (1): e3. doi:10.5334/jors.ac.

251

252

Exposito-Alonso, Moises, Francois Vasseur, Wei Ding, George Wang, Hernan A. A. Burbano, and Detlef Weigel. 2017. "Genomic Basis and Evolutionary Potential for Extreme Drought Adaptation in Arabidopsis Thaliana." *bioRxiv*. doi:10.1101/118067.

253

254



- 255 Itseez. 2015. "Open Source Computer Vision Library." <https://github.com/itseez/opencv>.
- 256 Purcell, Shaun, Benjamin Neale, Kathe Todd-Brown, Lori Thomas, Manuel A. R. Ferreira, David Bender, Julian
- 257 Maller, et al. 2007. "PLINK: A Tool Set for Whole-Genome Association and Population-Based Linkage
- 258 Analyses." *American Journal of Human Genetics* 81 (3): 559–75. doi:10.1086/519795.
- 259 Vasseur, Francois, Moises Exposito-Alonso, Oscar Ayala-Garay, George Wang, Brian J. Enquist, Cirile Violle,
- 260 Denis Ville, and Detlef Weigel. 2017. "Scaling Irregularities Explained by Local Adaptation in Arabidopsis
- 261 Thaliana." *Submitted*.

262

## Tables

263

**Table 1** Summaries of measurements from environmental sensor

| Site     | Rainfall | Soil water content (%) | Air temperature (°C) |
|----------|----------|------------------------|----------------------|
| Madrid   | out      | 14.53 (1.09, 17.46)    | 8.45 (5.34, 12.39)   |
| Madrid   | low      | 16.07 (11.38, 22.51)   | 9.96 (6.95, 15.13)   |
| Tübingen | low      | 14.74 (10.76, 20.09)   | 6.57 (3.27, 10.78)   |
| Tübingen | out      | 27.67 (22.82, 30.50)   | 5.60 (2.44, 9.54)    |
| Tübingen | high     | 24.62 (20.73, 29.02)   | 6.57 (3.27, 10.78)   |
| Madrid   | high     | 27.77 (22.62, 33.00)   | 9.84 (6.82, 15.13)   |

292

A total of 34 sensors were placed in the different treatment blocks as well as outside (out) of the foil tunnels (Fig. 2). The median (interquartile) values of all sensors per treatment and location are shown.

293

294

## Figures

295

### Figure 1. Geographic distribution of accessions

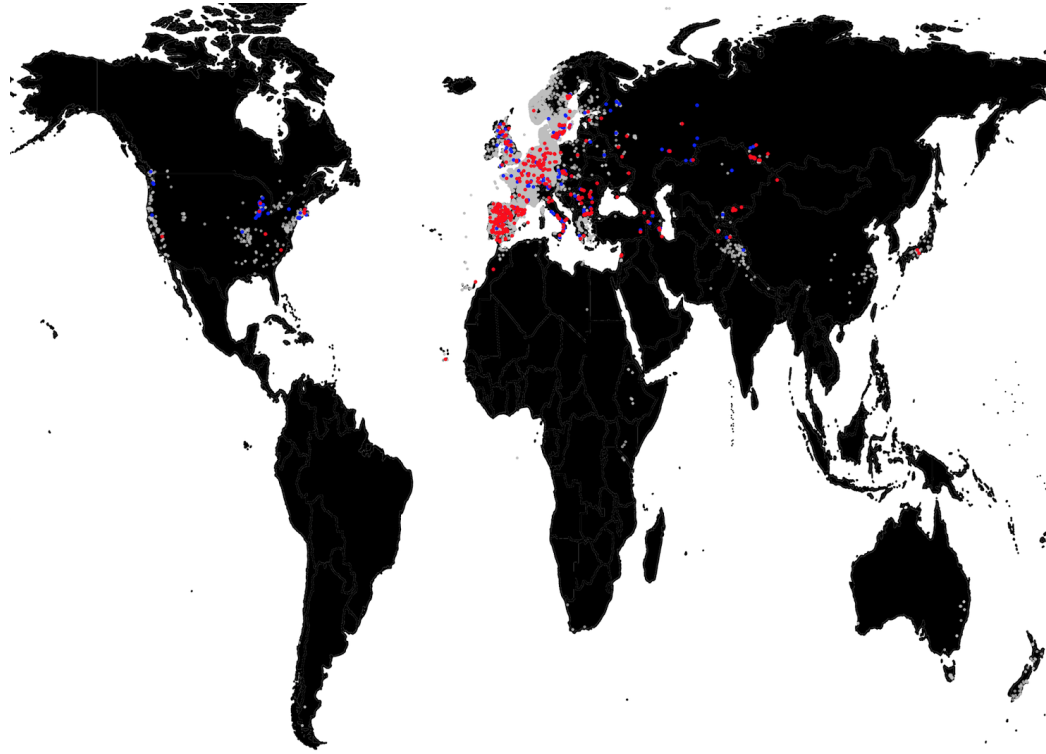

296

Locations of *Arabidopsis thaliana* accessions used in this experiment (red), 1001G accessions (blue), and all observations of the species in gbif.org (grey).

297

298

**Figure 2. Field experiment design**

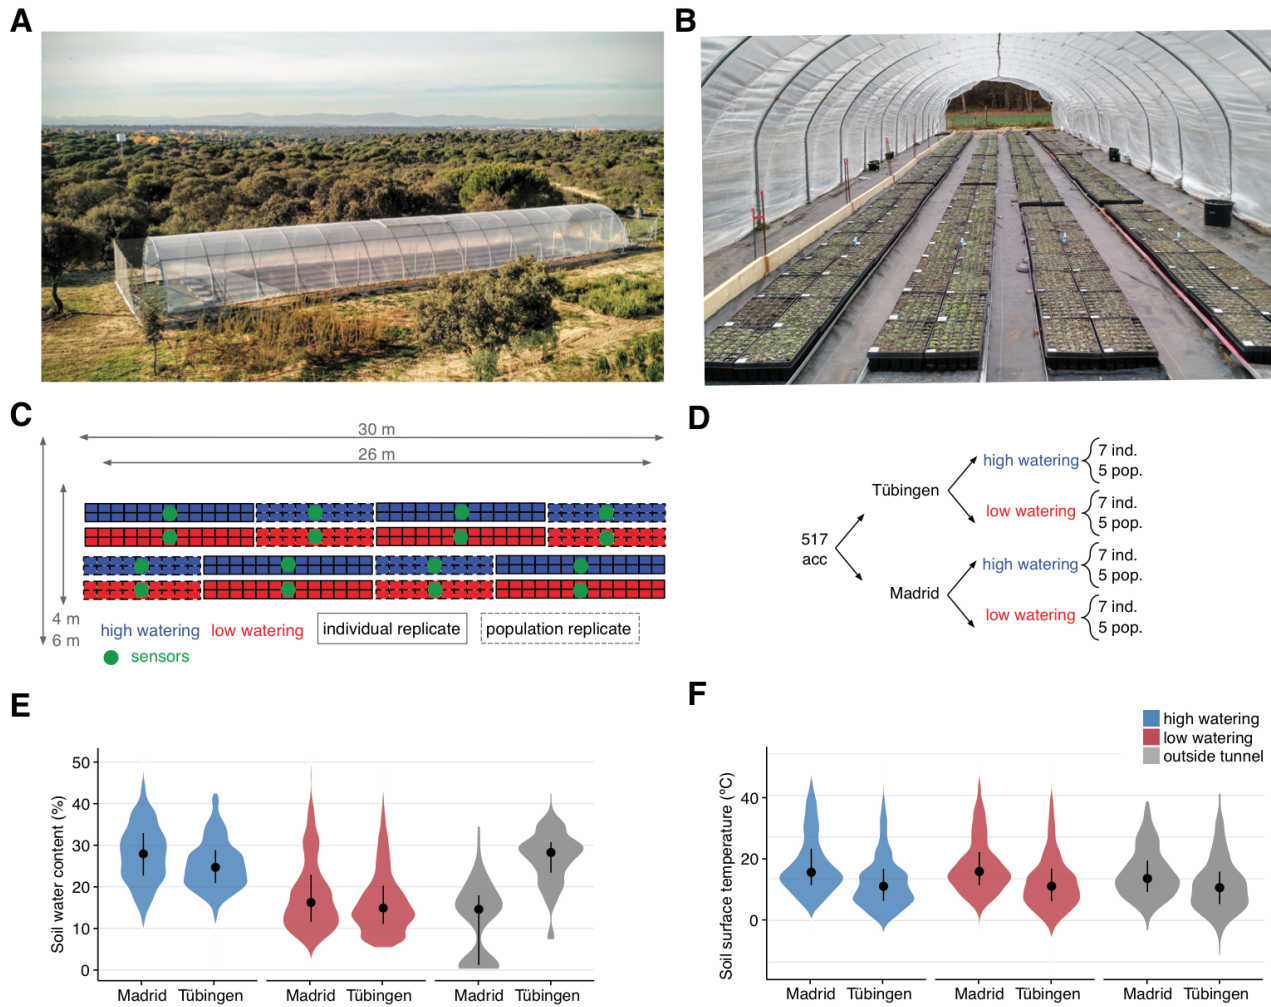

299 (A) Aerial picture of foil tunnel settings in Madrid and (B) photo inside the foil tunnel in Tübingen. (C)  
300 Spatial distribution of blocks and replicates and (D) experimental design. (E) Soil water content from the 34  
301 sensors monitoring each experimental block and conditions outside the tunnel.

302

### Figure 3. Rosette monitoring

**A**

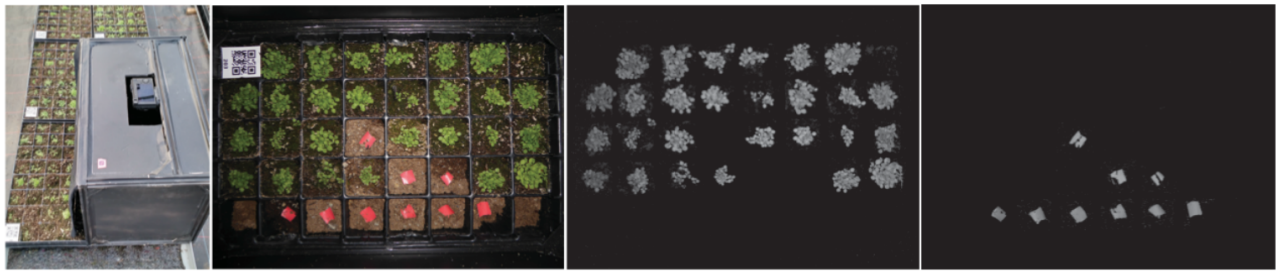

**B**

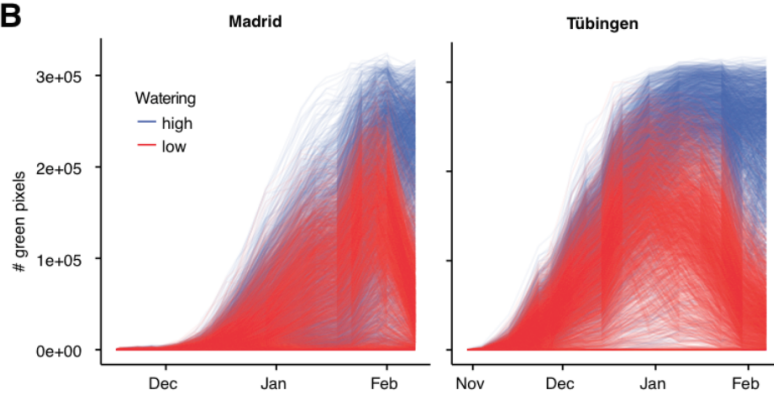

**C**

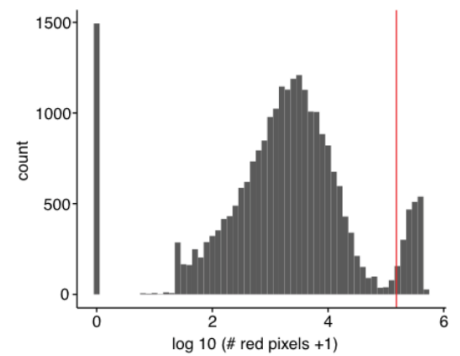

303 (A) Customized dark box for image acquisition and example tray with the corresponding green and red  
304 segmentation. (B) Trajectories of number of green pixels per pot, indicating rosette area, for Madrid and  
305 Tübingen. (C) Distribution of the sum of red pixels per pot over all time frames. The red vertical line  
306 indicates the heuristically chosen threshold to define whether the pot actually had a red label.

307

**Figure 4. Flowering time distributions**

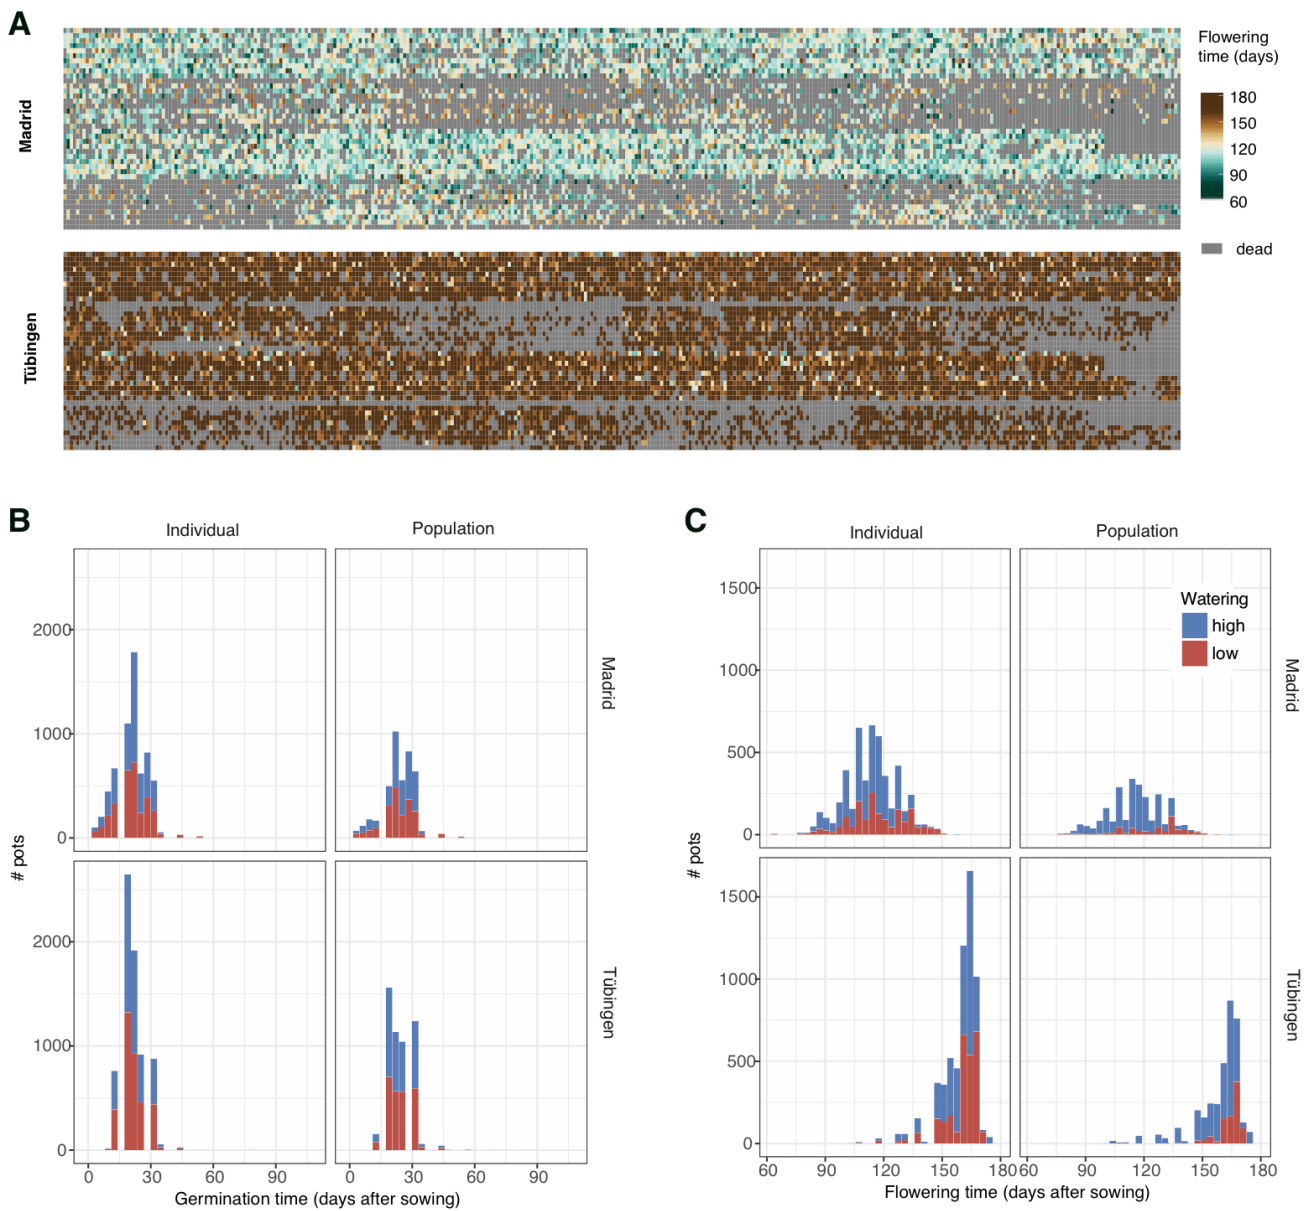

308 (A) Flowering times per pot in the same spatial arrangement as in each tunnel (see Fig. 3). (B) Distribution  
309 of germination times. (C) Distribution of flowering times.



310

**Figure 5. Inflorescence and seed set estimation**

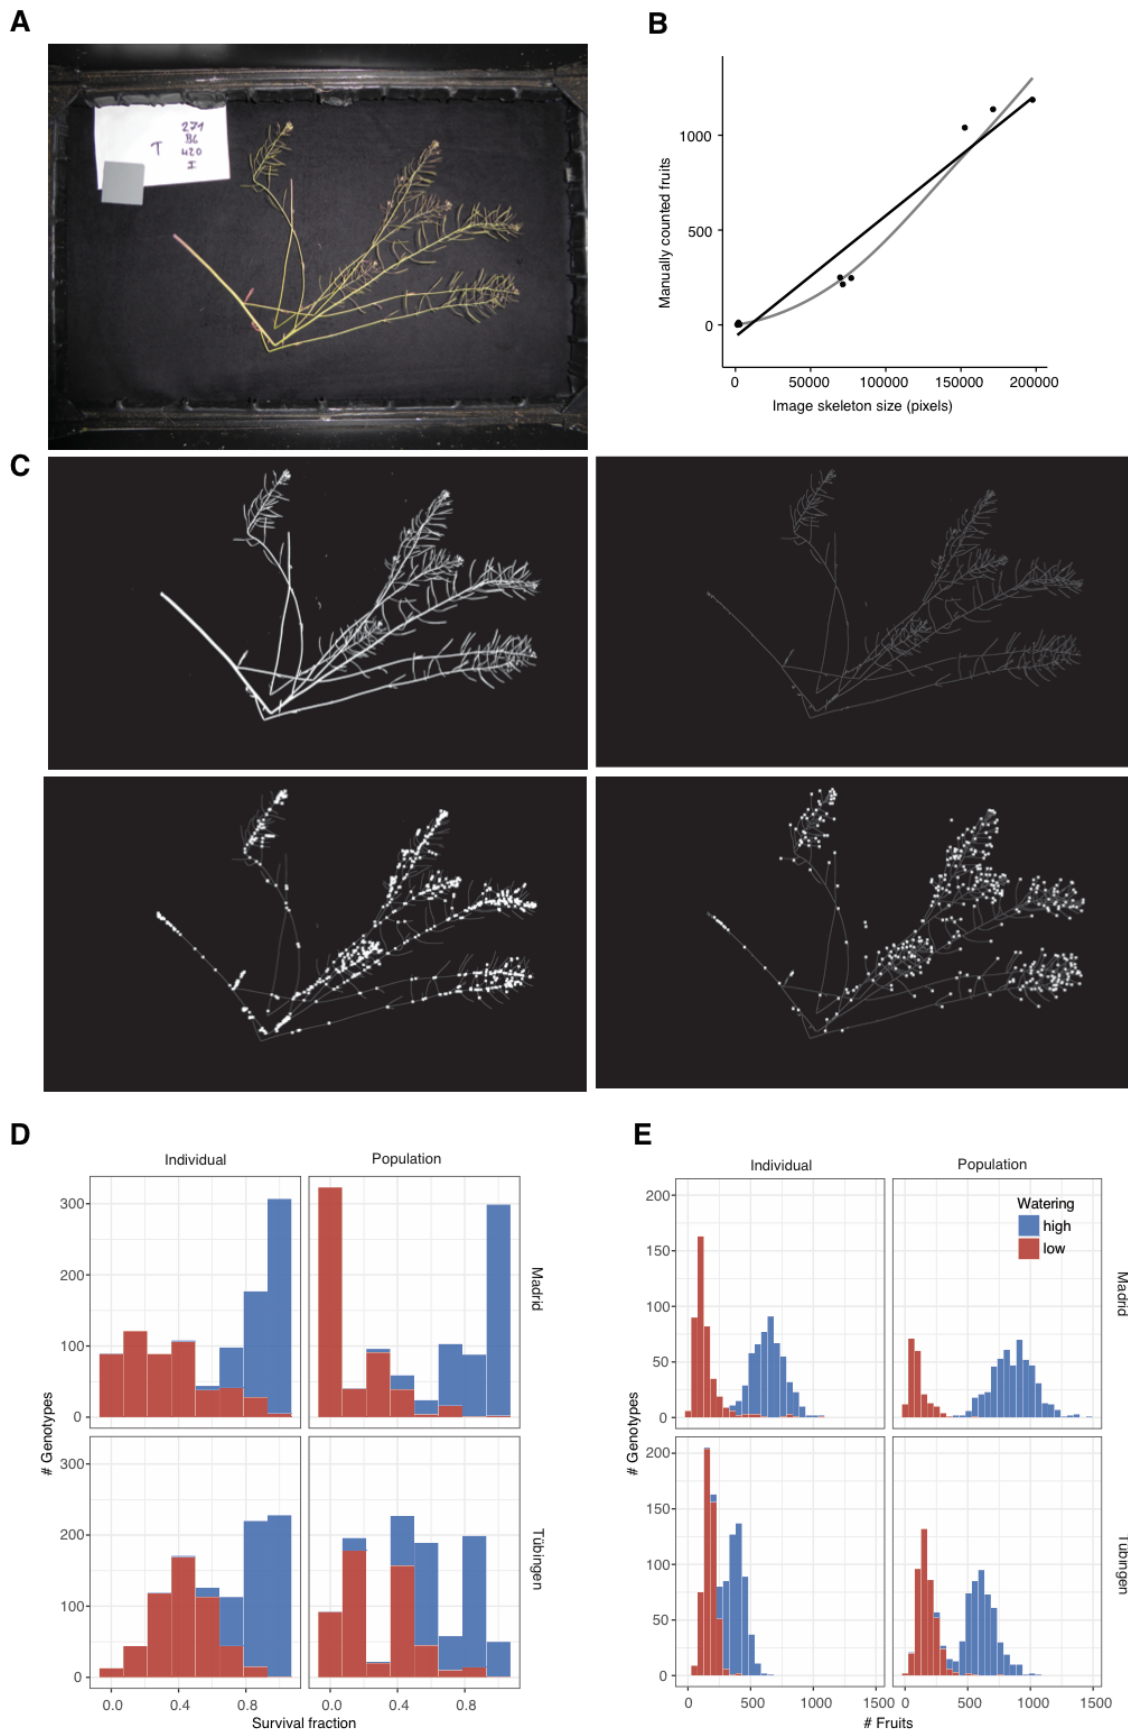

311 (A) Representative inflorescence picture and the resulting variables from image processing (B): total  
312 segmented area (upper-left), skeletonized inflorescence (upper-right), branching points (lower-left), and  
313 endpoints (lower-right). (C) Regression between the fruits of few manually counted inflorescences and the  
314 inflorescence size. The four variables inferred in (B) accurately predicted the manually counted  
315 inflorescences as example ( $R^2=0.97$ ,  $n=11$ ,  $p=10^{-4}$ ). Distribution of survival to reproduction (D) and fruits  
316 per plant (E) in the four environment treatments.
